# Supplementary material
Source: PubMed Central journal article supplement (PMC4828198)
Supplement: NIHMS769190-supplement-Sup__Table_1.pdf [file NIHMS769190-supplement-Sup__Table_1.pdf]

### Supplementary Table 1: Arrhenius Activation Energies

| Temperature Range (°C) | Activation Energy (kJ/mol) | Activation Energy (eV) | Example Reaction type |
|------------------------|----------------------------|------------------------|-----------------------|
| 20.7 - 24.3            | 56 ± 5                     | 0.58 ± 0.05            | metabolic             |
| 24.3--29.2             | 168 ± 3                    | 1.74 ± 0.03            | metabolic             |
| 29.7--31.8             | 552 ± 27                   | 5.72 ± 0.28            | unfolding of proteins |
| 32.3--35.1             | 186 ± 9                    | 1.93 ± 0.1             | metabolic             |

± show standard error
