# Supplementary material
Source: PubMed Central journal article supplement (PMC4828198)
Supplement: NIHMS769190-supplement-Sup_Table_2.pdf [file NIHMS769190-supplement-Sup_Table_2.pdf]

**Supplementary Table 2: Population Statistics**

| Figure      | Panel       | Reference Condition | Reference Population Size | Test Condition         | Test Population Size | Scale factor                                                                                                                                                                                                                 | KS Y Statistic | KS p-value | Additional Metadata |
|-------------|-------------|---------------------|---------------------------|------------------------|----------------------|------------------------------------------------------------------------------------------------------------------------------------------------------------------------------------------------------------------------------|----------------|------------|---------------------|
| 1           | b-c         | 20C                 | 1280                      | 25C                    | 1026                 | 0.733                                                                                                                                                                                                                        | 0.50           | 0.0258994  | wild type           |
| 1           | b-c         | 20C                 | 1280                      | 27C                    | 2029                 | 0.628                                                                                                                                                                                                                        | 1.47           | 0.2        | wild type           |
| 1           | d-e         | 25C                 | 3756                      | 33C                    | 4643                 | 0.042                                                                                                                                                                                                                        | 4.19           | 1.18E-15   | wild type           |
| 1           | f-g         | 0 mM                | 1588                      | 1.5 mM                 | 878                  | 0.145                                                                                                                                                                                                                        | 1.26           | 0.0852     | wild type           |
| 1           | f-g         | 0 mM                | 1588                      | 3 mM                   | 846                  | 0.064                                                                                                                                                                                                                        | 1.49           | 0.0234     | wild type           |
| 1           | f-g         | 0 mM                | 1588                      | 6 mM                   | 1129                 | 0.030                                                                                                                                                                                                                        | 1.96           | 0.0009     | wild type           |
| 1           | g-h         | UV-killed Bacteria  | 2462                      | Live Bacteria          | 1252                 | 0.667                                                                                                                                                                                                                        | 0.85           | >0.2       | wild type           |
| 2           | a,d         | wild type           | 1223                      | <i>daf-2(e1368)</i>    | 1163                 | 1.414                                                                                                                                                                                                                        | 1.57           | 0.0145079  | 25C                 |
| 2           | b-e         | wild type           | 1608                      | <i>daf-16(mu86)</i>    | 1491                 | 0.780                                                                                                                                                                                                                        | 1.28           | 0.0745341  | 25C                 |
| 2           | c-f         | wild type           | 993                       | <i>hsf1(sy441)</i>     | 1174                 | 0.723                                                                                                                                                                                                                        | 1.22           | 0.1027819  | 20C                 |
| 2           | g-j         | wild type           | 1365                      | <i>eat-2(ad1116)</i>   | 2462                 | 1.463                                                                                                                                                                                                                        | 2.30           | 4.95E-05   | 20C                 |
| 2           | h,k         | wild type           | 1140                      | <i>nuo-6(qm200)</i>    | 1038                 | 1.211                                                                                                                                                                                                                        | 4.52           | 3.43E-18   | 25C                 |
| 2           | i,l         | 20C                 | 583                       | 25C                    | 1038                 | 0.760                                                                                                                                                                                                                        | 0.73           | >0.2       | nuo-6               |
| Ex. 4       | d-e         | wildtype            | 1223                      | <i>age-1(hx546)</i>    | 1227                 | 1.647                                                                                                                                                                                                                        | 1.00           | >0.2       |                     |
| Ex. 4       | f-g         | wild type           | 501                       | <i>hif-1(ia4)</i>      | 544                  | 1.085                                                                                                                                                                                                                        | 0.45           | >0.2       | 25C                 |
| Ex. 4       | h-i         | 20C                 | 646                       | 22.5C                  | 474                  | 0.862                                                                                                                                                                                                                        | 0.65           | >0.2       | eat-2               |
| 3           | c           | 24C for 3 days      | 1065                      | 26C for 3 days         | 547                  |                                                                                                                                                                                                                              | 1.13           | 0.015877   | 29C scale           |
| 3           | c           | 24C for 3 days      | 1065                      | 27.5C for 3 days       | 573                  |                                                                                                                                                                                                                              | 1.56           | 0.0157039  | 29C scale           |
| 3           | c           | 24C for 3 days      | 1065                      | 29C for 3 days         | 563                  |                                                                                                                                                                                                                              | 5.29           | 1.08E-24   | 29C scale           |
| 3           | d           | 24C for 3 days      | 1065                      | 26C for 3 days         | 547                  |                                                                                                                                                                                                                              | 0.83           | >0.2       | 29C shift           |
| 3           | d           | 24C for 3 days      | 1065                      | 27.5C for 3 days       | 573                  |                                                                                                                                                                                                                              | 0.75           | >0.2       | 29C shift           |
| 3           | d           | 24C for 3 days      | 1065                      | 29C for 3 days         | 563                  |                                                                                                                                                                                                                              | 0.74           | >0.2       | 29C shift           |
| Ex. 4       | j-k         | wildtype            | 1539                      | <i>daf-2(e1368)</i>    | 1228                 | 1.473                                                                                                                                                                                                                        | 0.80           | >0.2       |                     |
| Ex. 4       | l-m         | wildtype            | 1680                      | <i>daf-16(mu86)</i>    | 1320                 | 0.762                                                                                                                                                                                                                        | 1.35           | 0.0535522  |                     |
| Ex. 4       | n-o         | wildtype            | 1574                      | <i>age-1(hx546)</i>    | 1314                 | 1.387                                                                                                                                                                                                                        | 1.55           | 0.016599   |                     |
| Ex. 5       | a-b         | 24C always          | 541                       | 29C always             | 563                  |                                                                                                                                                                                                                              | 1.62           | 0.010686   | scale               |
| Ex. 5       | b-c         | 24C always          | 541                       | 29C always             | 563                  |                                                                                                                                                                                                                              | 6.01           | 9.22E-32   | shift               |
| 4 and Ex. 3 | a-b and a-i | wildtype            | 16804                     | <i>n/a</i>             | <i>n/a</i>           | Scale factors were estimated using an accelerated failure time (AFT) regression<br>KS test statistics and p-values were estimated using the modified Kolomorogov-Smirnov test (Statistical Methods and Supplementary Note 2) |                |            |                     |
| 4           | c-d         | wildtype            | 2921                      | <i>age-1(hx546)II.</i> | 1140                 |                                                                                                                                                                                                                              |                |            |                     |
| 4           | c-d         | wildtype            | 2921                      | <i>daf-2(e1368)</i>    | 1059                 |                                                                                                                                                                                                                              |                |            |                     |
| 4           | c-d         | wildtype            | 2921                      | <i>daf-16(mu86) I</i>  | 1402                 |                                                                                                                                                                                                                              |                |            |                     |
| Ex. 7       | c           | wildtype            | 5839                      | <i>age-1(hx546)II.</i> | 1657                 |                                                                                                                                                                                                                              |                |            |                     |
| Ex. 7       | c           | wildtype            | 5839                      | <i>daf-2(e1368)</i>    | 584                  |                                                                                                                                                                                                                              |                |            |                     |
| Ex. 7       | c           | wildtype            | 5839                      | <i>daf-16(mu86) I</i>  | 1770                 |                                                                                                                                                                                                                              |                |            |                     |
| 4           | e           | wildtype            | 10811                     | <i>n/a</i>             | <i>n/a</i>           |                                                                                                                                                                                                                              |                |            |                     |
| 4           | f           | wildtype            | 5624                      | <i>age-1(hx546)II.</i> | 3028                 |                                                                                                                                                                                                                              |                |            |                     |
| 4           | f           | wildtype            | 5624                      | <i>daf-2(e1368)</i>    | 2880                 |                                                                                                                                                                                                                              |                |            |                     |
| 4           | f           | wildtype            | 5116                      | <i>daf-16(mu86) I</i>  | 3963                 |                                                                                                                                                                                                                              |                |            |                     |
| Figure      | Panel       | Group               | Population Size           | Group                  | Population Size      |                                                                                                                                                                                                                              |                |            |                     |
| Ex. 1       | a-i         | Replicate 1         | 1249                      | Replicate 2            | 1388                 |                                                                                                                                                                                                                              |                |            |                     |
|             |             | Replicate 3         | 816                       | Replicate 4            | 1230                 |                                                                                                                                                                                                                              |                |            |                     |
| 1 and Ex. 2 | a and a-b   | 20.1 °C             | 1733                      | 30.9 °C                | 1734                 |                                                                                                                                                                                                                              |                |            |                     |
|             |             | 23.7 °C             | 4069                      | 31.3 °C                | 1801                 |                                                                                                                                                                                                                              |                |            |                     |
|             |             | 25.2 °C             | 4207                      | 32.5 °C                | 1653                 |                                                                                                                                                                                                                              |                |            |                     |
|             |             | 29.1 °C             | 1573                      | 32.6 °C                | 4765                 |                                                                                                                                                                                                                              |                |            |                     |
|             |             | 30 °C               | 1743                      |                        |                      |                                                                                                                                                                                                                              |                |            |                     |
| Ex 4        | b           | 0 days              | 381                       | 2 days                 | 466                  |                                                                                                                                                                                                                              |                |            |                     |
|             |             | 1 day               | 294                       | 3 days                 | 388                  |                                                                                                                                                                                                                              |                |            |                     |
| Ex 4        | c           | t-Butanol           | 530                       | t-BuOOH                | 580                  |                                                                                                                                                                                                                              |                |            |                     |
| Ex 5        | d-g         | 0 days              | 501                       | 2 days                 | 529                  |                                                                                                                                                                                                                              |                |            |                     |
|             |             | 1 day               | 485                       | 3 days                 | 477                  |                                                                                                                                                                                                                              |                |            |                     |
| Ex 9        | l           | 1 shift             | 903                       | 5 shifts               | 975                  |                                                                                                                                                                                                                              |                |            |                     |
|             |             | 1 shift             | 1127                      | 5 shifts               | 952                  |                                                                                                                                                                                                                              |                |            |                     |
|             |             | 3 shifts            | 797                       |                        |                      |                                                                                                                                                                                                                              |                |            |                     |
|             |             | 3 shifts            | 905                       |                        |                      |                                                                                                                                                                                                                              |                |            |                     |
