# Supplementary material
Source: PubMed Central journal article supplement (PMC4828198)
Supplement: NIHMS769190-supplement-Sup_Table_3.pdf [file NIHMS769190-supplement-Sup_Table_3.pdf]

**Supplementary Table 3: Parameter estimates from the temperature and tBuOOH scaling functions**

| AFT Regression Parameters          |     |           |           |           |           |           |           |              | Arrhenius Energy Estimates |           |           |        | Predicted Temporal Scaling Across Thermal Range |       |       |           |        |                       |
|------------------------------------|-----|-----------|-----------|-----------|-----------|-----------|-----------|--------------|----------------------------|-----------|-----------|--------|-------------------------------------------------|-------|-------|-----------|--------|-----------------------|
| 20-29 °C<br>(Figure 4.d)           |     | $\beta_T$ | $\beta_T$ | $\beta_g$ | $\beta_g$ | $\beta_x$ | $\beta_x$ | $p(\beta_x)$ | Wild Type                  | Mutant    | Wild Type | Mutant | Offset used                                     | $T_1$ | $T_2$ | wild type | mutant | mutant                |
| Regime                             |     | stderr    | stderr    | stderr    | stderr    | stderr    | stderr    | <.001?       | (KJ/Kmol)                  | (KJ/Kmol) | (eV)      | (eV)   | to center T                                     |       |       | lambda    | lambda | relative to wild type |
| <i>daf-16 (mu86)</i>               | I.a | 7298.3    | 235       | -0.31     | 0.005     | 1073.4    | 399       | N            | 61                         | 70        | 0.63      | 0.72   | -3.4E-03                                        | 20    | 24.4  | 0.69      | 0.66   | 0.95                  |
| <i>daf-2(e1368)</i>                | I.a | 7438.9    | 245       | 0.34      | 0.006     | -3995.0   | 407       | Y            | 62                         | 29        | 0.64      | 0.30   | -3.4E-03                                        | 20    | 24.4  | 0.69      | 0.84   | 1.22                  |
| <i>age-1(hx546)</i>                | I.a | 7350.0    | 231       | 0.34      | 0.011     | -3643.8   | 683       | Y            | 61                         | 31        | 0.63      | 0.32   | -3.4E-03                                        | 20    | 24.4  | 0.69      | 0.83   | 1.20                  |
| <i>daf-16 (mu86)</i>               | I.b | 19280.7   | 270       | -0.31     | 0.005     | -1586.4   | 380       | Y            | 160                        | 147       | 1.66      | 1.52   | -3.3E-03                                        | 24.4  | 29.1  | 0.36      | 0.40   | 1.09                  |
| <i>daf-2(e1368)</i>                | I.b | 18815.2   | 287       | 0.46      | 0.006     | -309.7    | 358       | Y            | 156                        | 154       | 1.62      | 1.59   | -3.3E-03                                        | 24.4  | 29.1  | 0.37      | 0.38   | 1.02                  |
| <i>age-1(hx546)</i>                | I.b | 20206.4   | 272       | 0.48      | 0.006     | -1740.7   | 358       | Y            | 168                        | 154       | 1.74      | 1.59   | -3.3E-03                                        | 24.4  | 29.1  | 0.35      | 0.38   | 1.10                  |
| <b>29-35 °C (Extended Data 6c)</b> |     |           |           |           |           |           |           |              |                            |           |           |        |                                                 |       |       |           |        |                       |
| <i>daf-16 (mu86)</i>               | II  | 62846.2   | 642       | -0.18     | 0.008     | -15033.0  | 766       | Y            | 523                        | 398       | 5.42      | 4.12   | -3.3E-03                                        | 29.1  | 32.1  | 0.13      | 0.21   | 1.63                  |
| <i>daf-2(e1368)</i>                | II  | 66551.5   | 772       | 0.24      | 0.010     | 1039.2    | 1268      | N            | 553                        | 562       | 5.73      | 5.82   | -3.3E-03                                        | 29.1  | 32.1  | 0.11      | 0.11   | 0.97                  |
| <i>age-1(hx546)</i>                | II  | 65173.8   | 760       | 0.32      | 0.010     | -1853.2   | 1202      | N            | 542                        | 526       | 5.62      | 5.46   | -3.3E-03                                        | 29.1  | 32.1  | 0.12      | 0.13   | 1.06                  |
| <i>daf-16 (mu86)</i>               | III | 28838.0   | 515       | -0.11     | 0.008     | 4541.2    | 658       | Y            | 240                        | 278       | 2.48      | 2.88   | -3.3E-03                                        | 32.1  | 35    | 0.41      | 0.36   | 0.87                  |
| <i>daf-2(e1368)</i>                | III | 28893.2   | 531       | 0.34      | 0.012     | 2629.5    | 890       | Y            | 240                        | 262       | 2.49      | 2.72   | -3.3E-03                                        | 32.1  | 35    | 0.41      | 0.38   | 0.92                  |
| <i>age-1(hx546)</i>                | III | 28876.9   | 496       | 0.30      | 0.008     | 3479.1    | 666       | Y            | 240                        | 269       | 2.49      | 2.79   | -3.3E-03                                        | 32.1  | 35    | 0.41      | 0.37   | 0.90                  |

Details on the regressions are provided in Statistical Methods

| <b>tBuOOH</b><br>(Figure 4e) | $\beta_C$ | $\beta_B$ | $\beta_r$ | $\beta_r$ | $\beta_r$ | $\beta_r$ | $\beta_X$ | $\beta_X$ | $\beta_X$ | $\beta_X$ |
|------------------------------|-----------|-----------|-----------|-----------|-----------|-----------|-----------|-----------|-----------|-----------|
|                              | stderr    | stderr    | 1         | 1         | stderr    | stderr    | 1         | 1         | stderr    | stderr    |
|                              |           |           | stderr    | stderr    |           |           | stderr    | stderr    |           |           |
|                              |           |           | r         | r         |           |           | r         | r         |           |           |
| wild type                    | -1.84     | 0.0219    | 0.06      | 0.04      | 0.23      | 0.0       | 0.22      | 0.22      | 0.126     | 0.126     |

Details on the regressions are provided in Statistical Methods
